# Supplementary material for: Determination of Residual Diisocyanates and Related Diamines in Biodegradable Mulch Films Using N-Ethoxycarbonylation Derivatization and GC-MS
Source: MDPI journal article supplement (doi:10.3390/molecules27196754), 2022-10-10
Supplement: s1 [file s1]

**Table S1** Optimization of ECF volume for *N*-ethoxycarbonylation derivatization

| Diamines | ECF volume / Relative response factors as derivatization efficiency <sup>a</sup> |                  |                  |                  |                  |
|----------|----------------------------------------------------------------------------------|------------------|------------------|------------------|------------------|
|          | 10 $\mu$ L                                                                       | 30 $\mu$ L       | 50 $\mu$ L       | 70 $\mu$ L       | 90 $\mu$ L       |
| DAB      | 0.61a $\pm$ 0.02                                                                 | 0.79b $\pm$ 0.02 | 0.80b $\pm$ 0.02 | 0.81b $\pm$ 0.02 | 0.75b $\pm$ 0.03 |
| HDA      | 0.92a $\pm$ 0.05                                                                 | 1.15b $\pm$ 0.04 | 1.20b $\pm$ 0.04 | 1.21b $\pm$ 0.05 | 1.17b $\pm$ 0.05 |
| IPDA     | 0.58a $\pm$ 0.01                                                                 | 0.76b $\pm$ 0.02 | 0.78b $\pm$ 0.02 | 0.77b $\pm$ 0.02 | 0.71b $\pm$ 0.02 |
| LEE      | 0.55a $\pm$ 0.02                                                                 | 0.74b $\pm$ 0.02 | 0.77b $\pm$ 0.02 | 0.78b $\pm$ 0.03 | 0.69b $\pm$ 0.03 |
| 2,6-TDA  | 0.48a $\pm$ 0.03                                                                 | 0.60b $\pm$ 0.02 | 0.62b $\pm$ 0.03 | 0.60b $\pm$ 0.03 | 0.58b $\pm$ 0.03 |
| 2,4-TDA  | 0.75a $\pm$ 0.05                                                                 | 0.91b $\pm$ 0.03 | 0.91b $\pm$ 0.04 | 0.92b $\pm$ 0.04 | 0.87b $\pm$ 0.05 |
| DDCM     | 0.55a $\pm$ 0.02                                                                 | 0.79b $\pm$ 0.02 | 0.80b $\pm$ 0.02 | 0.81b $\pm$ 0.03 | 0.75b $\pm$ 0.03 |

<sup>a</sup> The relative response factors were the peak area of the *N*-ethoxycarbonylation derivatives of diamines divided by the internal standard (DAP).

**Table S2** Optimization of derivatization-extraction time for *N*-ethoxycarbonylation derivatization

| Diamines | Derivatization-extraction time / Relative response factors as derivatization efficiency <sup>a</sup> |                  |                  |                  |                  |
|----------|------------------------------------------------------------------------------------------------------|------------------|------------------|------------------|------------------|
|          | 1 min                                                                                                | 2 min            | 3 min            | 4 min            | 5 min            |
| DAB      | 0.82a $\pm$ 0.03                                                                                     | 0.84a $\pm$ 0.03 | 0.83a $\pm$ 0.04 | 0.80a $\pm$ 0.02 | 0.85a $\pm$ 0.04 |
| HDA      | 1.15a $\pm$ 0.04                                                                                     | 1.19a $\pm$ 0.04 | 1.25a $\pm$ 0.05 | 1.20a $\pm$ 0.04 | 1.25a $\pm$ 0.05 |
| IPDA     | 0.80a $\pm$ 0.03                                                                                     | 0.82a $\pm$ 0.02 | 0.83a $\pm$ 0.02 | 0.83a $\pm$ 0.03 | 0.84a $\pm$ 0.02 |
| LEE      | 0.73a $\pm$ 0.02                                                                                     | 0.76a $\pm$ 0.02 | 0.77a $\pm$ 0.03 | 0.78a $\pm$ 0.02 | 0.78a $\pm$ 0.03 |
| 2,6-TDA  | 0.54a $\pm$ 0.04                                                                                     | 0.59a $\pm$ 0.04 | 0.57a $\pm$ 0.05 | 0.57a $\pm$ 0.04 | 0.58a $\pm$ 0.05 |
| 2,4-TDA  | 0.91a $\pm$ 0.06                                                                                     | 0.96a $\pm$ 0.04 | 0.93a $\pm$ 0.05 | 0.94a $\pm$ 0.06 | 0.94a $\pm$ 0.05 |
| DDCM     | 0.86a $\pm$ 0.03                                                                                     | 0.85a $\pm$ 0.04 | 0.83a $\pm$ 0.04 | 0.84a $\pm$ 0.03 | 0.84a $\pm$ 0.03 |

<sup>a</sup> The relative response factors were the peak area of the *N*-ethoxycarbonylation derivatives of diamines divided by the internal standard (DAP).

**Table S3** Optimization of extraction solvent for *N*-ethoxycarbonylation derivatization

| Diamines | Different polarity solvent / Relative response factors as derivatization efficiency <sup>a</sup> |                   |                         |                  |                  |                  |
|----------|--------------------------------------------------------------------------------------------------|-------------------|-------------------------|------------------|------------------|------------------|
|          | Petroleum ether                                                                                  | <i>n</i> -Hexane  | Methyl tert-butyl ether | Ethyl ether      | Ethyl acetate    | Chloroform       |
| DAB      | 0.04a $\pm$ 0.004                                                                                | 0.08b $\pm$ 0.008 | 0.80b $\pm$ 0.04        | 0.83b $\pm$ 0.05 | 0.85b $\pm$ 0.03 | 0.86b $\pm$ 0.06 |
| HDA      | 0.79a $\pm$ 0.06                                                                                 | 0.97b $\pm$ 0.07  | 1.24c $\pm$ 0.05        | 1.24c $\pm$ 0.04 | 1.27c $\pm$ 0.04 | 1.25c $\pm$ 0.05 |
| IPDA     | 0.18a $\pm$ 0.01                                                                                 | 0.17a $\pm$ 0.01  | 0.72b $\pm$ 0.03        | 0.79b $\pm$ 0.03 | 0.80b $\pm$ 0.04 | 0.82b $\pm$ 0.04 |
| LEE      | 0.23a $\pm$ 0.03                                                                                 | 0.23a $\pm$ 0.02  | 0.77b $\pm$ 0.04        | 0.81b $\pm$ 0.03 | 0.83b $\pm$ 0.03 | 0.83b $\pm$ 0.04 |
| 2,6-TDA  | 0.42a $\pm$ 0.10                                                                                 | 0.47a $\pm$ 0.08  | 0.48a $\pm$ 0.06        | 0.60b $\pm$ 0.04 | 0.60b $\pm$ 0.05 | 0.62b $\pm$ 0.06 |
| 2,4-TDA  | 0.54a $\pm$ 0.15                                                                                 | 0.63a $\pm$ 0.12  | 0.84b $\pm$ 0.06        | 0.91b $\pm$ 0.05 | 0.93b $\pm$ 0.05 | 0.95b $\pm$ 0.08 |
| DDCM     | 0.04a $\pm$ 0.01                                                                                 | 0.08a $\pm$ 0.02  | 0.78b $\pm$ 0.04        | 0.83b $\pm$ 0.05 | 0.85b $\pm$ 0.04 | 0.84b $\pm$ 0.07 |

<sup>a</sup> The relative response factors were the peak area of the *N*-ethoxycarbonylation derivatives of diamines divided by the internal standard (DAP).
